# Supplementary material for: NEDD4 regulates ubiquitination and stability of the cell adhesion molecule IGPR-1 via lysosomal pathway
Source: PubMed Central journal article supplement (PMC8103646; doi:10.1186/s12929-021-00731-9), 2021-05-07

S. Figure 3

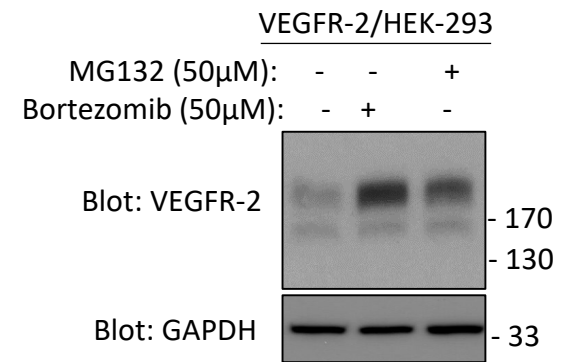

Supplement: 12929_2021_731_MOESM3_ESM.pdf [file 12929_2021_731_MOESM3_ESM.pdf]
